# Supplementary material
Source: Springer Nature journal article supplement (https://www.springermedizin.de/resource/supplementary/12957_2012_995_MOESM4_ESM.pdf/9562180)

## AFP variations

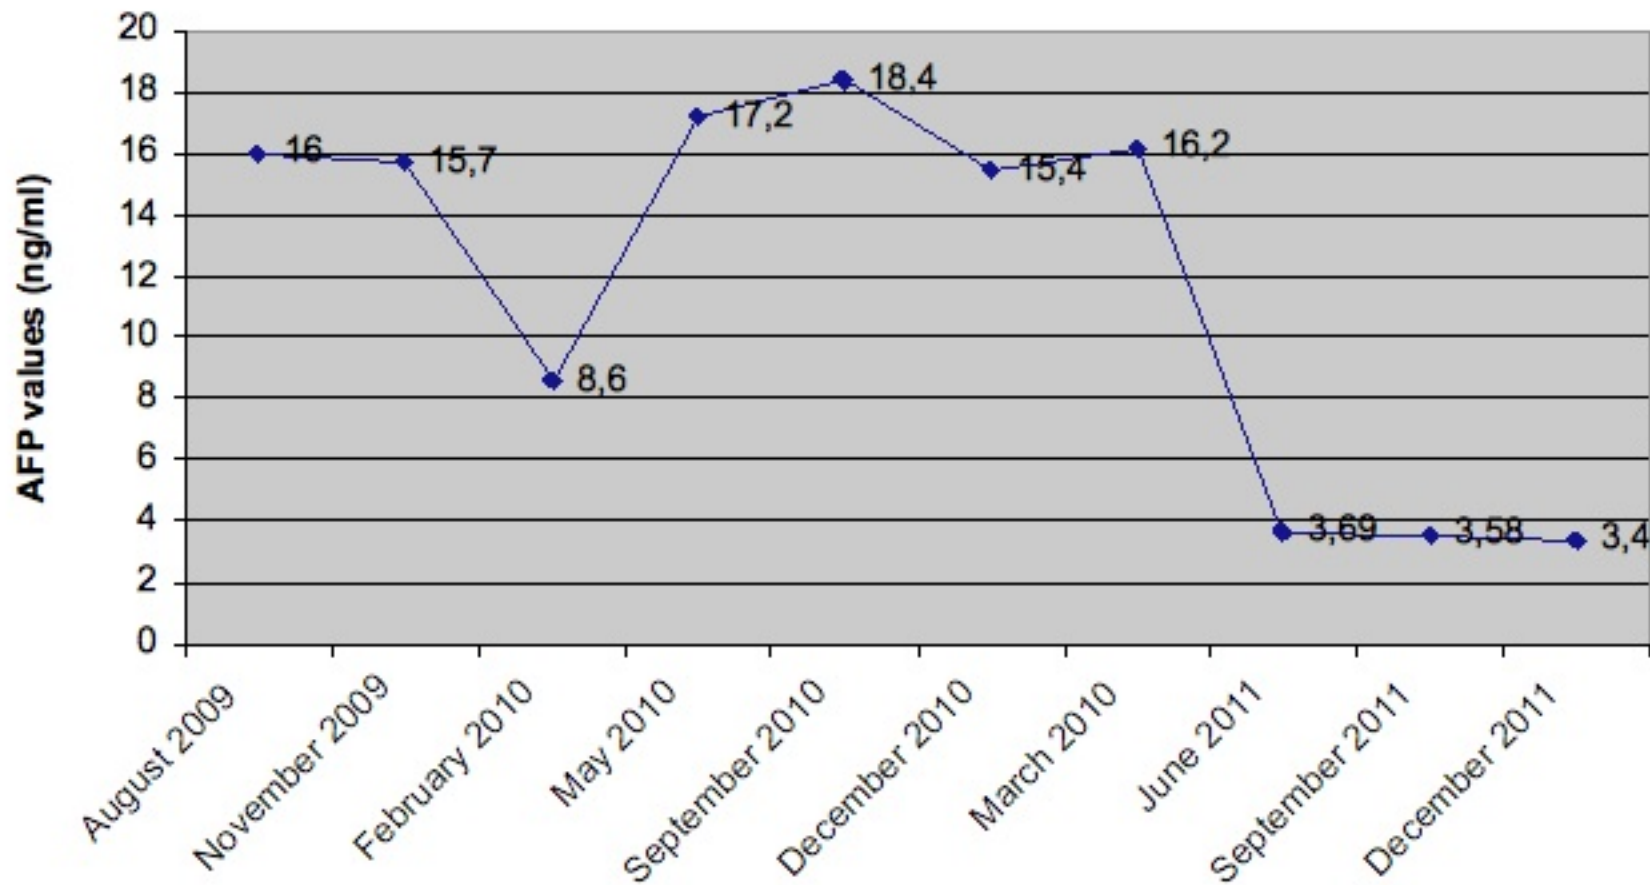

Supplement: MOESM4 [file 9562180]
